# Supplementary material for: Global whole landscape connectivity to complement protected area connectivity
Source: Research Square preprint supplement (doi:10.21203/rs.3.rs-6457802/v1), 2025-05-14
Supplement: Supplementary file 1 [file 644f5003ff5a3c213d6320ab.docx]

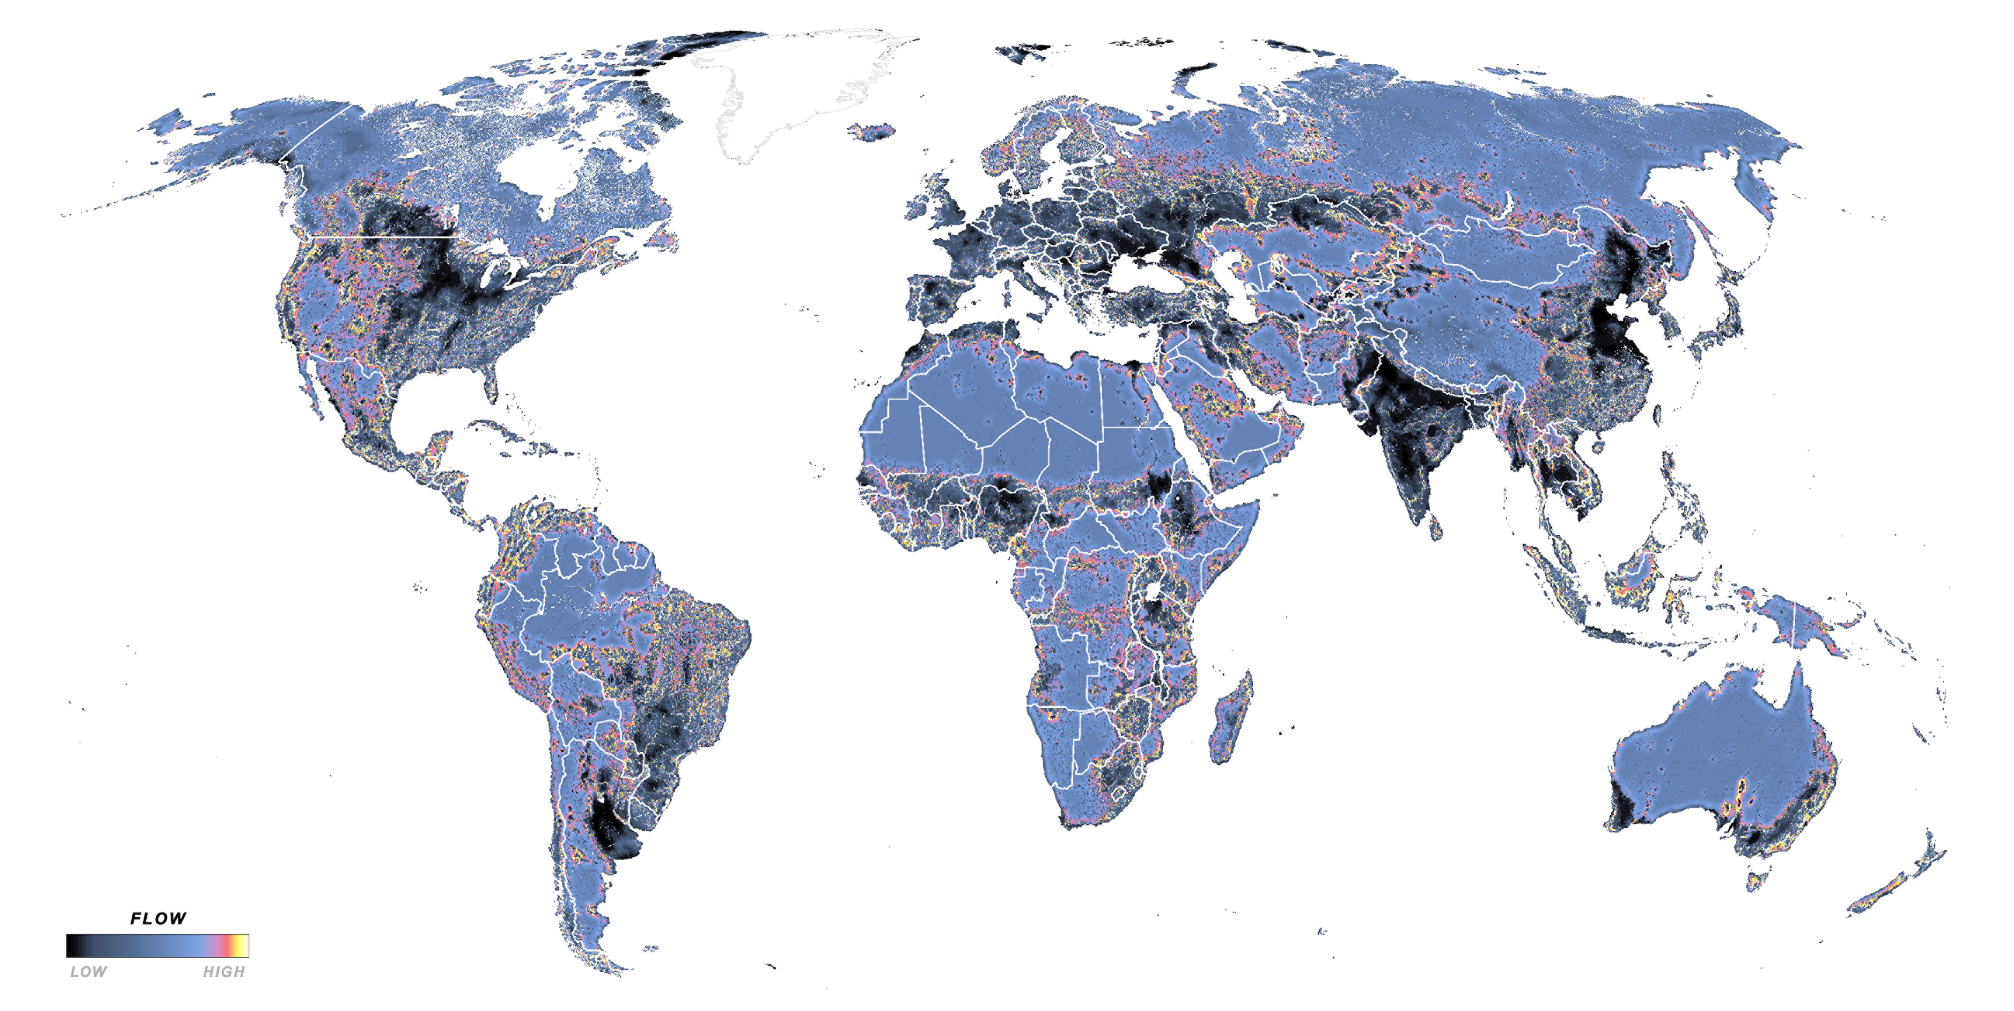


**Fig S1 | Global continuous connectivity** Global connectivity of the world’s terrestrial natural lands modeled using omnidirectional connectivity modeling. Low connectivity areas (darker colors) can be found in human modified areas and high connectivity (yellows) can be found in pinch points and corridors across areas with human modification.

**Table S1 | Distribution of resistance, flow, potential flow, and normalized flow values for each connectivity category.** Global connectivity categories were defined for each output layer based on thresholds identified by Cameron et al. 2022 and data distribution across resistance values.


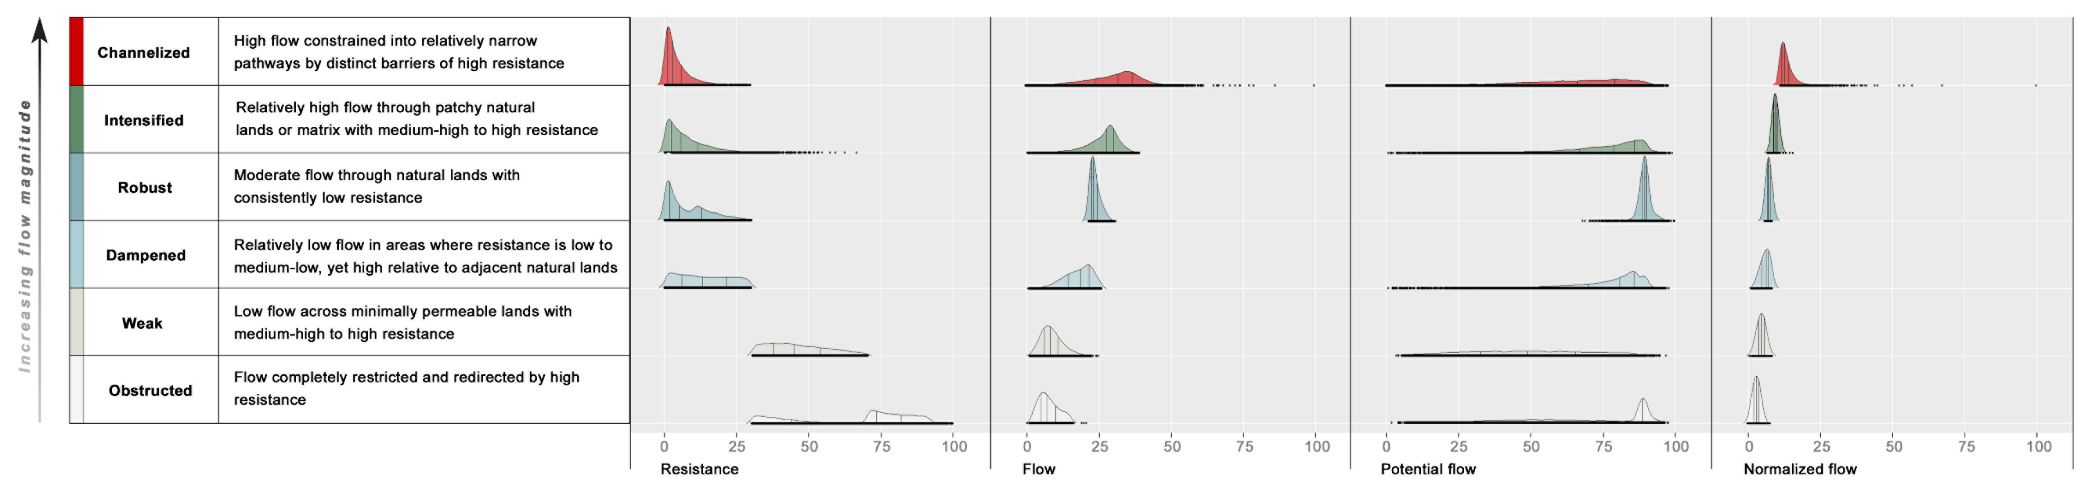


**Table S2 | Percentage of connectivity categories by biome.**

| Biome | Channelized | Diffuse | | | | Impeded | | |
| --- | --- | --- | --- | --- | --- | --- | --- | --- |
| Dampened | Intensified | Robust | Total | Weak | Obstructed | Total |
| Boreal Forests/Taiga | 1.0 | 37.4 | 7.7 | 52.0 | 97.0 | 1.7 | 0.4 | 2.0 |
| Deserts & Xeric Shrublands | 0.6 | 17.1 | 4.8 | 71.3 | 93.2 | 5.4 | 0.9 | 6.3 |
| Flooded Grasslands & Savannas | 2.6 | 30.0 | 10.1 | 41.6 | 81.7 | 13.4 | 2.3 | 15.7 |
| Mediterranean Forests, Woodlands & Scrub | 5.8 | 28.0 | 12.2 | 18.0 | 58.2 | 33.9 | 2.1 | 36.0 |
| Montane Grasslands & Shrublands | 1.0 | 44.0 | 6.9 | 42.2 | 93.1 | 5.4 | 0.6 | 5.9 |
| Temperate Broadleaf & Mixed Forests | 5.4 | 28.4 | 16.0 | 8.7 | 53.1 | 38.2 | 3.4 | 41.5 |
| Temperate Conifer Forests | 3.4 | 34.1 | 15.6 | 40.1 | 89.8 | 5.5 | 1.3 | 6.8 |
| Temperate Grasslands, Savannas & Shrublands | 3.2 | 29.8 | 10.6 | 21.3 | 61.7 | 33.6 | 1.4 | 35.1 |
| Tropical & Subtropical Coniferous Forests | 5.8 | 32.2 | 23.1 | 30.6 | 86.0 | 6.3 | 2.0 | 8.3 |
| Tropical & Subtropical Dry Broadleaf Forests | 5.5 | 32.7 | 14.1 | 14.6 | 61.3 | 31.4 | 1.7 | 33.1 |
| Tropical & Subtropical Grasslands, Savannas & Shrublands | 1.8 | 32.5 | 9.9 | 45.6 | 88.0 | 9.6 | 0.6 | 10.2 |
| Tropical & Subtropical Moist Broadleaf Forests | 4.4 | 29.1 | 13.0 | 38.9 | 81.0 | 12.9 | 1.8 | 14.6 |
| Tundra | 2.1 | 47.4 | 11.2 | 39.0 | 97.6 | 0.2 | 0.1 | 0.3 |

**Table S3 | Percentage of connectivity flow categories by continent.**

| Continent | Channelized | Diffuse | | | | Impeded | | |
| --- | --- | --- | --- | --- | --- | --- | --- | --- |
| Intensified | Robust | Dampened | Total | Weak | Obstructed | Total |
| Africa | 1.2 | 7.2 | 57.8 | 26.2 | 91.1 | 7.0 | 0.6 | 7.6 |
| Asia | 3.8 | 11.2 | 32.7 | 29.7 | 73.6 | 20.8 | 1.9 | 22.7 |
| Europe | 2.6 | 8.6 | 41.6 | 28.1 | 78.3 | 18.1 | 1.0 | 19.1 |
| North America | 3.4 | 15.0 | 23.5 | 41.8 | 80.3 | 14.7 | 1.6 | 16.3 |
| Oceania | 2.2 | 5.9 | 68.7 | 16.4 | 91.0 | 6.1 | 0.7 | 6.9 |
| South America | 2.1 | 11.5 | 44.1 | 32.6 | 88.2 | 8.7 | 1.1 | 9.8 |

**Table S4 | Percentage of global Omniscape connectivity categories within countries greater than 10,000 km2.**

| Country | Channelized | Diffuse | | | | Impeded | | |
| --- | --- | --- | --- | --- | --- | --- | --- | --- |
| Intensified | Dampened | Robust | Total | Obstructed | Weak | Impeded |
| Afghanistan | 1.4 | 12.1 | 47.7 | 33.0 | 92.7 | 0.3 | 5.6 | 5.9 |
| Albania | 9.5 | 22.0 | 33.4 | 10.9 | 66.3 | 2.3 | 21.9 | 24.2 |
| Algeria | 0.5 | 2.2 | 9.3 | 84.5 | 96.0 | 0.5 | 3.0 | 3.5 |
| Angola | 0.3 | 5.6 | 26.4 | 65.6 | 97.6 | 0.4 | 1.7 | 2.1 |
| Argentina | 1.5 | 8.9 | 28.4 | 42.7 | 80.0 | 0.8 | 17.7 | 18.5 |
| Armenia | 14.1 | 18.0 | 38.5 | 2.2 | 58.6 | 1.8 | 25.5 | 27.3 |
| Australia | 1.5 | 5.0 | 14.4 | 72.0 | 91.4 | 0.7 | 6.4 | 7.2 |
| Austria | 5.6 | 13.2 | 26.8 | 13.6 | 53.6 | 3.2 | 37.7 | 40.9 |
| Azerbaijan | 13.8 | 15.8 | 29.2 | 0.9 | 45.9 | 2.2 | 38.1 | 40.3 |
| Bahamas | 81.0 | 10.0 | 5.3 | 0.0 | 15.3 | 1.5 | 2.3 | 3.8 |
| Bangladesh | 1.6 | 5.7 | 15.3 | 1.4 | 22.5 | 1.0 | 75.0 | 75.9 |
| Belarus | 10.5 | 13.2 | 29.8 | 0.6 | 43.6 | 1.2 | 44.7 | 45.9 |
| Belgium | 0.3 | 7.7 | 2.2 | 3.6 | 13.5 | 12.8 | 73.4 | 86.2 |
| Belize | 11.4 | 40.7 | 34.5 | 4.3 | 79.4 | 2.5 | 6.7 | 9.2 |
| Benin | 6.4 | 21.3 | 45.9 | 1.9 | 69.1 | 0.5 | 23.9 | 24.4 |
| Bhutan | 0.3 | 17.6 | 44.5 | 35.8 | 97.8 | 1.1 | 0.8 | 1.9 |
| Bolivia | 0.2 | 4.5 | 29.9 | 61.8 | 96.2 | 0.5 | 3.0 | 3.5 |
| Bosnia and Herzegovina | 10.0 | 18.6 | 31.1 | 16.6 | 66.3 | 7.2 | 16.5 | 23.7 |
| Botswana | 0.1 | 3.9 | 20.1 | 74.7 | 98.7 | 0.3 | 0.9 | 1.2 |
| Brazil | 2.4 | 12.8 | 36.7 | 37.6 | 87.1 | 1.1 | 9.4 | 10.5 |
| Bulgaria | 11.1 | 12.8 | 26.3 | 1.0 | 40.1 | 1.1 | 47.7 | 48.8 |
| Burkina Faso | 3.7 | 12.4 | 65.3 | 3.1 | 80.8 | 0.3 | 15.2 | 15.5 |
| Burundi | 4.3 | 6.0 | 53.4 | 0.2 | 59.5 | 0.6 | 35.5 | 36.2 |
| C. A. R. | 0.0 | 0.7 | 13.2 | 85.5 | 99.4 | 0.5 | 0.1 | 0.6 |
| Cambodia | 7.3 | 24.3 | 25.3 | 0.9 | 50.5 | 0.3 | 41.9 | 42.2 |
| Cameroon | 0.8 | 12.7 | 31.3 | 47.2 | 91.2 | 1.1 | 6.9 | 8.0 |
| Canada | 2.4 | 14.5 | 58.4 | 18.0 | 90.9 | 0.4 | 6.3 | 6.7 |
| Chad | 0.7 | 5.4 | 21.4 | 68.7 | 95.5 | 0.1 | 3.7 | 3.8 |
| Chile | 5.4 | 17.4 | 38.6 | 32.0 | 88.1 | 1.2 | 5.4 | 6.6 |
| China | 2.0 | 10.3 | 37.0 | 30.6 | 77.9 | 2.1 | 18.0 | 20.1 |
| Colombia | 1.2 | 15.6 | 26.4 | 53.2 | 95.2 | 1.5 | 2.1 | 3.6 |
| Congo | 0.1 | 4.4 | 22.2 | 72.2 | 98.9 | 0.6 | 0.5 | 1.1 |
| Costa Rica | 13.7 | 22.5 | 36.1 | 9.2 | 67.8 | 3.7 | 14.7 | 18.4 |
| Croatia | 10.2 | 13.3 | 27.3 | 5.3 | 45.9 | 2.4 | 41.5 | 43.9 |
| Cuba | 24.8 | 14.7 | 29.3 | 1.6 | 45.6 | 0.7 | 29.0 | 29.7 |
| Czech Republic | 4.2 | 13.0 | 12.3 | 1.3 | 26.6 | 3.4 | 65.9 | 69.2 |
| D.R. Congo | 0.4 | 7.5 | 27.6 | 62.0 | 97.1 | 1.3 | 1.3 | 2.5 |
| Denmark | 4.5 | 10.1 | 0.9 | 0.0 | 10.9 | 4.4 | 80.2 | 84.6 |
| Djibouti | 0.3 | 15.3 | 44.1 | 38.8 | 98.3 | 0.5 | 0.9 | 1.4 |
| Dominican Republic | 14.9 | 24.2 | 37.3 | 6.8 | 68.4 | 2.8 | 14.0 | 16.8 |
| East Timor | 33.2 | 25.2 | 33.0 | 0.0 | 58.1 | 0.3 | 8.4 | 8.7 |
| Ecuador | 5.2 | 18.1 | 30.3 | 37.6 | 86.0 | 2.5 | 6.3 | 8.8 |
| Egypt | 0.2 | 4.3 | 20.7 | 68.9 | 93.9 | 1.7 | 4.1 | 5.9 |
| El Salvador | 6.8 | 13.8 | 33.7 | 11.2 | 58.7 | 3.7 | 30.8 | 34.5 |
| Equatorial Guinea | 3.3 | 4.7 | 39.8 | 48.2 | 92.7 | 2.4 | 1.7 | 4.0 |
| Eritrea | 0.6 | 12.4 | 51.4 | 34.0 | 97.7 | 0.2 | 1.6 | 1.8 |
| Estonia | 16.8 | 17.1 | 33.3 | 2.3 | 52.7 | 1.3 | 29.3 | 30.5 |
| Ethiopia | 2.4 | 9.0 | 38.6 | 36.6 | 84.2 | 0.3 | 13.1 | 13.4 |
| Falkland Islands | 57.8 | 29.1 | 12.6 | 0.0 | 41.8 | 0.0 | 0.5 | 0.5 |
| Finland | 4.4 | 19.5 | 48.0 | 13.6 | 81.1 | 0.7 | 13.8 | 14.5 |
| France | 3.9 | 9.3 | 14.1 | 16.7 | 40.0 | 2.7 | 53.4 | 56.1 |
| Gabon | 0.1 | 2.3 | 19.4 | 77.1 | 98.9 | 0.7 | 0.3 | 1.0 |
| Gambia | 7.2 | 9.8 | 45.0 | 0.0 | 54.8 | 1.0 | 37.1 | 38.0 |
| Georgia | 7.7 | 26.5 | 32.3 | 11.3 | 70.2 | 1.9 | 20.3 | 22.1 |
| Germany | 3.3 | 11.7 | 9.0 | 1.4 | 22.0 | 5.4 | 69.3 | 74.7 |
| Ghana | 6.0 | 16.8 | 46.1 | 13.0 | 75.8 | 2.9 | 15.3 | 18.2 |
| Greece | 17.0 | 18.8 | 25.1 | 3.6 | 47.5 | 2.0 | 33.5 | 35.6 |
| Guatemala | 7.4 | 18.2 | 36.3 | 20.0 | 74.5 | 5.5 | 12.6 | 18.1 |
| Guinea | 0.2 | 8.9 | 43.9 | 44.7 | 97.5 | 1.0 | 1.3 | 2.3 |
| Guinea-Bissau | 2.3 | 21.3 | 48.3 | 26.3 | 95.8 | 0.5 | 1.4 | 1.9 |
| Guyana | 0.0 | 1.1 | 15.0 | 81.8 | 97.8 | 1.4 | 0.8 | 2.2 |
| Haiti | 23.1 | 25.7 | 37.2 | 7.3 | 70.3 | 1.1 | 5.5 | 6.6 |
| Honduras | 6.3 | 22.4 | 35.9 | 20.7 | 79.0 | 6.9 | 7.8 | 14.7 |
| Hungary | 2.4 | 8.4 | 10.9 | 0.2 | 19.5 | 2.5 | 75.6 | 78.1 |
| Iceland | 5.6 | 16.0 | 63.7 | 12.6 | 92.3 | 0.1 | 2.0 | 2.1 |
| India | 5.5 | 8.9 | 20.8 | 2.4 | 32.1 | 1.9 | 60.5 | 62.4 |
| Indonesia | 12.8 | 17.7 | 24.7 | 24.1 | 66.5 | 4.0 | 16.8 | 20.7 |
| Iran | 3.3 | 12.9 | 32.3 | 36.4 | 81.6 | 1.1 | 14.1 | 15.2 |
| Iraq | 2.2 | 8.3 | 28.3 | 42.8 | 79.4 | 1.0 | 17.5 | 18.5 |
| Ireland | 4.1 | 13.2 | 11.3 | 16.5 | 41.0 | 1.7 | 53.2 | 54.9 |
| Israel | 3.0 | 22.7 | 17.9 | 8.1 | 48.7 | 12.0 | 36.4 | 48.3 |
| Italy | 7.3 | 12.6 | 14.0 | 4.4 | 31.0 | 6.8 | 55.0 | 61.7 |
| Ivory Coast | 2.2 | 14.7 | 41.6 | 30.9 | 87.1 | 2.7 | 8.1 | 10.8 |
| Jamaica | 28.0 | 24.1 | 31.8 | 0.0 | 55.9 | 2.1 | 14.0 | 16.2 |
| Japan | 14.3 | 20.5 | 24.2 | 4.6 | 49.3 | 9.0 | 27.5 | 36.5 |
| Jordan | 1.2 | 13.4 | 13.8 | 61.6 | 88.9 | 2.3 | 7.7 | 9.9 |
| Kazakhstan | 1.7 | 10.4 | 27.0 | 49.7 | 87.1 | 0.7 | 10.6 | 11.3 |
| Kenya | 2.0 | 10.6 | 29.5 | 42.7 | 82.8 | 0.5 | 14.7 | 15.2 |
| Kuwait | 0.8 | 20.5 | 27.6 | 23.8 | 71.9 | 5.7 | 21.6 | 27.3 |
| Kyrgyzstan | 1.9 | 19.4 | 50.8 | 17.3 | 87.5 | 0.8 | 9.8 | 10.6 |
| Laos | 1.9 | 23.2 | 35.1 | 31.2 | 89.6 | 0.5 | 8.1 | 8.5 |
| Latvia | 9.6 | 16.3 | 38.8 | 2.8 | 57.8 | 0.7 | 31.9 | 32.6 |
| Lebanon | 7.9 | 15.3 | 20.7 | 1.6 | 37.6 | 4.4 | 50.2 | 54.5 |
| Lesotho | 5.9 | 25.9 | 51.5 | 0.9 | 78.3 | 0.4 | 15.4 | 15.8 |
| Liberia | 1.3 | 28.0 | 43.4 | 24.7 | 96.1 | 1.2 | 1.4 | 2.6 |
| Libyan A. J. | 0.0 | 0.9 | 7.8 | 90.0 | 98.7 | 0.5 | 0.9 | 1.3 |
| Lithuania | 6.4 | 11.6 | 26.2 | 0.7 | 38.5 | 1.3 | 53.8 | 55.1 |
| Madagascar | 0.7 | 13.5 | 54.8 | 28.2 | 96.5 | 0.3 | 2.5 | 2.7 |
| Malawi | 10.0 | 13.0 | 28.4 | 0.2 | 41.6 | 0.5 | 48.0 | 48.4 |
| Malaysia | 9.4 | 18.7 | 21.6 | 20.6 | 61.0 | 6.2 | 23.5 | 29.7 |
| Mali | 0.6 | 5.4 | 23.4 | 65.1 | 94.0 | 0.1 | 5.3 | 5.4 |
| Mauritania | 0.0 | 0.9 | 8.8 | 90.1 | 99.8 | 0.1 | 0.1 | 0.2 |
| Mexico | 3.6 | 17.8 | 34.4 | 30.6 | 82.8 | 1.9 | 11.7 | 13.6 |
| Moldova | 3.3 | 3.5 | 7.4 | 0.0 | 10.9 | 1.4 | 84.4 | 85.8 |
| Mongolia | 0.0 | 1.2 | 15.7 | 82.7 | 99.6 | 0.2 | 0.2 | 0.4 |
| Montenegro | 6.6 | 27.2 | 37.9 | 18.5 | 83.6 | 3.6 | 6.2 | 9.8 |
| Morocco | 2.1 | 8.5 | 31.7 | 40.7 | 80.9 | 0.8 | 16.1 | 17.0 |
| Mozambique | 1.1 | 18.3 | 41.6 | 34.5 | 94.3 | 0.4 | 4.1 | 4.6 |
| Myanmar | 2.8 | 21.6 | 33.7 | 21.0 | 76.3 | 0.6 | 20.3 | 20.9 |
| Namibia | 0.2 | 2.0 | 25.3 | 71.4 | 98.7 | 0.8 | 0.4 | 1.2 |
| Nepal | 2.9 | 14.9 | 62.9 | 5.3 | 83.0 | 0.5 | 13.6 | 14.1 |
| Netherlands | 1.7 | 6.9 | 0.5 | 0.1 | 7.5 | 13.0 | 77.8 | 90.8 |
| New Zealand | 8.6 | 24.7 | 46.0 | 12.2 | 82.8 | 1.6 | 7.1 | 8.6 |
| Nicaragua | 8.3 | 21.4 | 39.1 | 24.0 | 84.5 | 1.6 | 5.5 | 7.2 |
| Niger | 0.3 | 2.8 | 12.8 | 77.6 | 93.3 | 0.1 | 6.4 | 6.5 |
| Nigeria | 5.1 | 13.7 | 33.0 | 5.5 | 52.2 | 1.3 | 41.4 | 42.7 |
| North Korea | 5.4 | 28.1 | 37.8 | 5.7 | 71.6 | 0.6 | 22.4 | 23.0 |
| North Macedonia | 18.8 | 18.2 | 33.3 | 2.8 | 54.3 | 1.5 | 25.4 | 27.0 |
| Norway | 7.7 | 30.6 | 46.5 | 8.8 | 85.9 | 0.5 | 5.9 | 6.4 |
| Oman | 1.3 | 9.5 | 27.5 | 58.2 | 95.2 | 1.8 | 1.8 | 3.6 |
| Pakistan | 1.5 | 8.1 | 39.0 | 24.4 | 71.5 | 1.2 | 25.8 | 27.0 |
| Panama | 18.3 | 27.2 | 42.7 | 6.2 | 76.1 | 0.7 | 4.9 | 5.6 |
| Papua New Guinea | 5.8 | 10.5 | 34.6 | 48.2 | 93.2 | 0.4 | 0.6 | 1.0 |
| Paraguay | 2.4 | 14.1 | 39.2 | 34.1 | 87.4 | 0.4 | 9.8 | 10.2 |
| Peru | 0.1 | 8.0 | 24.5 | 64.4 | 96.9 | 1.3 | 1.6 | 3.0 |
| Philippines | 25.4 | 17.1 | 16.6 | 1.2 | 34.9 | 1.4 | 38.2 | 39.7 |
| Poland | 5.7 | 11.6 | 12.4 | 0.7 | 24.7 | 2.7 | 67.0 | 69.6 |
| Portugal | 3.8 | 11.4 | 15.3 | 20.3 | 46.9 | 4.5 | 44.7 | 49.3 |
| Qatar | 12.4 | 33.5 | 18.5 | 1.6 | 53.6 | 5.2 | 28.9 | 34.1 |
| Romania | 6.8 | 11.8 | 22.1 | 3.4 | 37.2 | 1.6 | 54.4 | 56.0 |
| Russian Federation | 1.3 | 6.9 | 29.6 | 54.1 | 90.6 | 0.5 | 7.7 | 8.1 |
| Rwanda | 8.2 | 3.7 | 16.9 | 0.1 | 20.8 | 1.3 | 69.7 | 71.1 |
| Saudi Arabia | 0.3 | 7.6 | 17.0 | 71.3 | 95.9 | 1.9 | 2.0 | 3.8 |
| Senegal | 1.6 | 9.2 | 36.5 | 31.6 | 77.3 | 0.5 | 20.6 | 21.1 |
| Serbia | 7.1 | 11.5 | 23.7 | 6.5 | 41.7 | 2.7 | 48.5 | 51.2 |
| Sierra Leone | 2.1 | 13.6 | 46.6 | 34.6 | 94.7 | 1.8 | 1.4 | 3.1 |
| Slovakia | 10.3 | 14.8 | 21.0 | 4.8 | 40.6 | 2.2 | 46.9 | 49.1 |
| Slovenia | 10.7 | 15.6 | 22.0 | 19.1 | 56.6 | 2.9 | 29.9 | 32.8 |
| Solomon Is | 70.9 | 13.0 | 14.7 | 0.0 | 27.7 | 0.0 | 1.4 | 1.4 |
| Somalia | 0.5 | 6.2 | 34.3 | 57.1 | 97.6 | 0.4 | 1.5 | 1.9 |
| South Africa | 2.9 | 12.1 | 35.3 | 38.1 | 85.6 | 1.3 | 10.3 | 11.5 |
| South Korea | 6.0 | 18.0 | 17.7 | 7.2 | 43.0 | 8.1 | 43.0 | 51.1 |
| South Sudan | 0.0 | 1.7 | 17.1 | 80.4 | 99.2 | 0.5 | 0.3 | 0.7 |
| Spain | 6.9 | 12.3 | 24.2 | 6.4 | 42.9 | 2.4 | 47.8 | 50.2 |
| Sri Lanka | 16.0 | 11.8 | 30.0 | 9.2 | 51.0 | 1.4 | 31.6 | 33.0 |
| Sudan | 0.7 | 5.6 | 24.0 | 61.0 | 90.6 | 0.4 | 8.3 | 8.7 |
| Suriname | 0.3 | 5.0 | 14.3 | 77.9 | 97.2 | 1.4 | 1.0 | 2.4 |
| Swaziland | 6.6 | 17.4 | 44.0 | 6.4 | 67.8 | 0.9 | 24.7 | 25.6 |
| Sweden | 3.3 | 17.4 | 54.5 | 11.1 | 83.0 | 0.8 | 12.9 | 13.7 |
| Switzerland | 14.8 | 15.2 | 24.6 | 5.7 | 45.5 | 4.3 | 35.4 | 39.7 |
| Syria | 1.8 | 9.0 | 25.7 | 30.3 | 64.9 | 1.1 | 32.2 | 33.3 |
| Taiwan | 18.5 | 15.2 | 29.3 | 0.8 | 45.4 | 12.5 | 23.6 | 36.1 |
| Tajikistan | 2.6 | 11.7 | 67.0 | 8.5 | 87.2 | 1.1 | 9.2 | 10.2 |
| Tanzania | 4.3 | 18.5 | 38.2 | 18.2 | 74.9 | 0.5 | 20.3 | 20.8 |
| Thailand | 8.0 | 12.6 | 16.9 | 4.4 | 33.9 | 2.5 | 55.6 | 58.1 |
| Togo | 4.9 | 19.7 | 43.3 | 4.6 | 67.7 | 0.8 | 26.6 | 27.4 |
| Tunisia | 2.7 | 8.1 | 31.0 | 39.3 | 78.4 | 1.4 | 17.5 | 18.9 |
| Turkey | 10.0 | 15.1 | 36.7 | 2.7 | 54.4 | 1.4 | 34.2 | 35.6 |
| Turkmenistan | 1.0 | 10.2 | 29.4 | 52.8 | 92.4 | 0.5 | 6.2 | 6.7 |
| Uganda | 7.6 | 14.8 | 31.3 | 9.7 | 55.8 | 0.6 | 35.9 | 36.5 |
| Ukraine | 4.7 | 6.9 | 12.3 | 0.6 | 19.7 | 1.3 | 74.3 | 75.6 |
| United Arab Emirates | 1.7 | 18.2 | 26.6 | 33.9 | 78.7 | 6.9 | 12.8 | 19.6 |
| United Kingdom | 7.6 | 13.2 | 10.6 | 5.6 | 29.5 | 6.0 | 57.0 | 63.0 |
| United States | 3.6 | 14.3 | 29.1 | 27.7 | 71.1 | 2.6 | 22.9 | 25.4 |
| Uruguay | 3.3 | 8.8 | 54.0 | 14.6 | 77.4 | 0.6 | 18.7 | 19.3 |
| Uzbekistan | 3.0 | 12.4 | 21.7 | 44.5 | 78.6 | 3.0 | 15.4 | 18.4 |
| Vanuatu | 65.3 | 23.4 | 10.7 | 0.0 | 34.1 | 0.0 | 0.7 | 0.7 |
| Venezuela | 2.8 | 12.4 | 25.5 | 54.5 | 92.4 | 2.2 | 2.7 | 4.9 |
| Vietnam | 6.6 | 17.5 | 33.6 | 6.8 | 57.9 | 2.8 | 32.8 | 35.5 |
| Western Sahara | 0.0 | 0.5 | 14.9 | 84.6 | 99.9 | 0.1 | 0.1 | 0.2 |
| Yemen | 1.4 | 7.0 | 26.3 | 62.3 | 95.6 | 0.6 | 2.5 | 3.1 |
| Zambia | 1.2 | 10.1 | 39.8 | 43.9 | 93.8 | 0.5 | 4.5 | 5.0 |
| Zimbabwe | 6.1 | 20.2 | 47.5 | 8.8 | 76.5 | 0.3 | 17.2 | 17.4 |

**Table S5 | List of sensitivity testing models tested to determine impact of model parameters on current flow.** C value indicates the rescaling parameter in a negative exponential function used to transform the huma modification resistance data. Higher c values indicate a more exponential function with lower resistance to low and moderate human modification values and lower c value indicates a more linear transformation, where lower human modifications are relatively higher resistance compared to an exponential function.

|  | **Resistance** | **Source** | **Radius** |
| --- | --- | --- | --- |
| **Sensitivity 1** |  |  |  |
| *Goal: Determine impact of source layer on output* | |  |  |
| [Default model] | HM (untransformed) | 1-HM | 125 |
|  | HM (c=2) | 1-HM | 125 |
|  | HM (c=2) | uniform 1 | 125 |
|  | HM (c=2) | Proportional natural lands | 125 |
|  | HM (c=2) | Other natural lands layer? |  |
| **Sensitivity 2** |  |  |  |
| *Goal: Determine impact of resistance layer on output* | |  |  |
| [Default model] | HM (untransformed) | 1-HM | *125* |
|  | HM (c=2; grazing included) | Proportional natural lands | 125 |
|  | HM (c=2; slope included) | Proportional natural lands | 125 |
|  | HM (c=2; water as 1000) | Proportional natural lands | 125 |
|  | HM (c=2) | Proportional natural lands | 125 |
|  |  |  |  |
|  | HM (c=.25) | Proportional natural lands | 125 |
|  | HM (c=4) | Proportional natural lands | 125 |
|  | HM (c=8) | Proportional natural lands | 125 |
|  |  |  |  |
| **Sensitivity 3** |  |  |  |
| *Goal: Determining the impact of other model parameters* | |  |  |
|  | HM (c=2) | Proportional natural lands | 125 |
|  | HM (c=2) | Proportional natural lands | 50 |
|  | HM (c=2) | Proportional natural lands | 450 |

**Table S6 | Pearson correlation coefficients for all model sensitivity runs.** We tested 1) differences in resistance transformation (c= 0.25, c=2, c=4, c=8 in a negative exponential function), 2) resistance data with grazing included and excluded, 3) including water as maximum resistance vs a uniform random resistance value (default), 4) different radius sizes (50 km, 125 km, and 450 km) and 5) using different source data (a uniform source (1) and commonly used source (1-HM)).

|  | c0.25, 125km | c2, 125km | c2, 50km | c2, 450km | c4, 25km | c8, 125km | c2, 125km, 1-HM | c2, 125km, 1 | c2, 125km, Grazing included | c2, 125km, Water high resistance |
| --- | --- | --- | --- | --- | --- | --- | --- | --- | --- | --- |
| c0.25, 125 km |  | 0.99 | 0.96 | 0.94 | 0.95 | 0.86 | 0.86 | 0.90 | 0.98 | 0.98 |
| c2, 125 km | 0.99 |  | 0.98 | 0.95 | 0.98 | 0.91 | 0.86 | 0.90 | 0.99 | 0.99 |
| c2, 50 km | 0.96 | 0.98 |  | 0.91 | 0.97 | 0.91 | 0.82 | 0.88 | 0.97 | 0.96 |
| c2 450 km | 0.94 | 0.95 | 0.91 |  | 0.93 | 0.86 | 0.84 | 0.84 | 0.94 | 0.93 |
| c4, 25 km | 0.95 | 0.98 | 0.97 | 0.93 |  | 0.96 | 0.82 | 0.87 | 0.98 | 0.96 |
| c8, 125 km | 0.86 | 0.91 | 0.91 | 0.86 | 0.96 |  | 0.71 | 0.78 | 0.92 | 0.89 |
| c2, 125 km, 1-HM | 0.86 | 0.86 | 0.82 | 0.84 | 0.82 | 0.71 |  | 0.83 | 0.84 | 0.85 |
| c2, 125 km, 1 | 0.90 | 0.90 | 0.88 | 0.84 | 0.87 | 0.78 | 0.83 |  | 0.89 | 0.89 |
| c2, 125 km, Grazing included | 0.98 | 0.99 | 0.97 | 0.94 | 0.98 | 0.92 | 0.84 | 0.89 |  | 0.98 |
| c2, 125 km, Water high resistance | 0.98 | 0.99 | 0.96 | 0.93 | 0.96 | 0.89 | 0.85 | 0.89 | 0.98 |  |

**
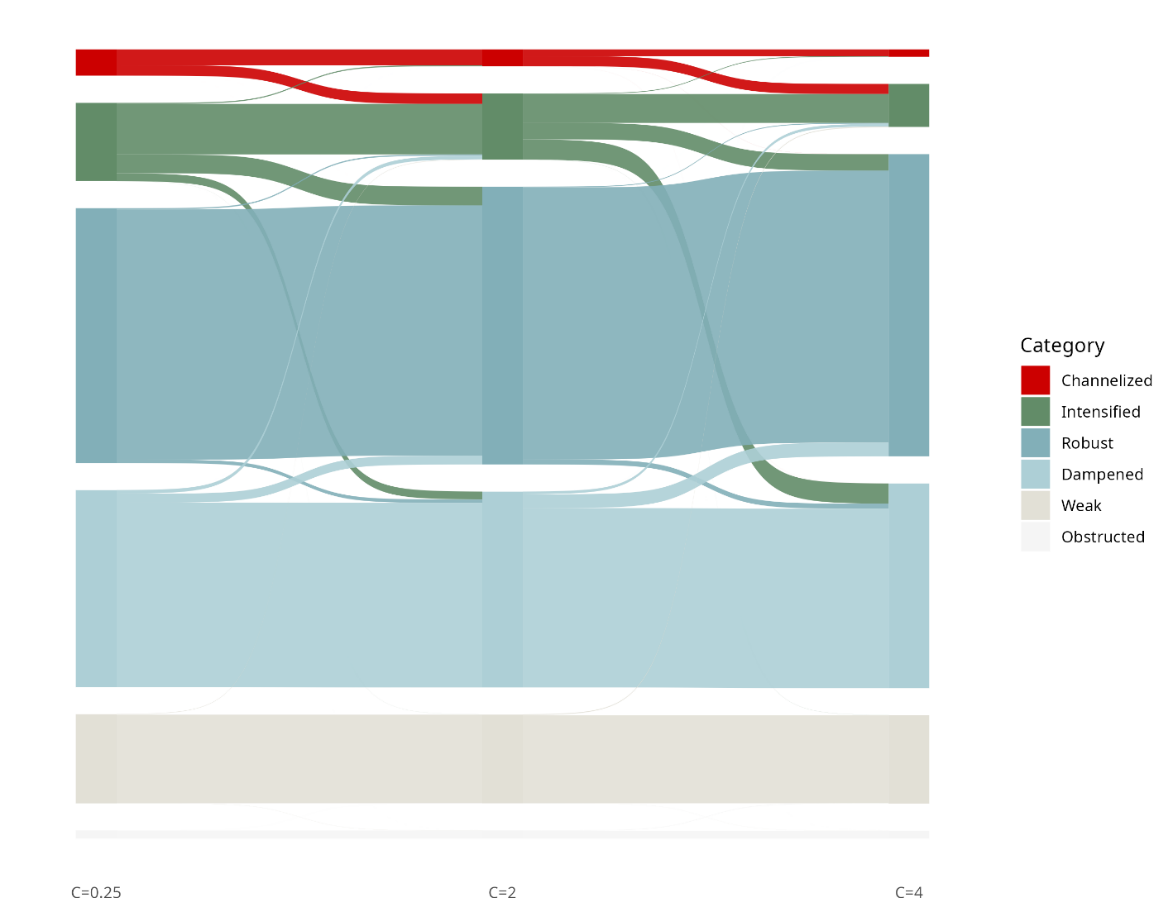
**

**Fig. S2 | Changes in pixel assignments across flow categories with changes in rescaling parameter of the exponential transformation in resistance data.** The impeded, weak, and dampened connectivity categories are relatively resistant to changes in resistance layer transformation. The channelized and intensified categories decrease with increasing rescaling parameter (c) values. The robust category increases in pixel count with increasing c values. With higher c values, higher values of the untransformed resistance data will have lower resistance values, once transformed, leading to a relative increase in flow across these areas. This is reflected in the increase in the robust flow category and a decrease in the channelized category.
